# Supplementary material for: PathFinder: a novel graph transformer model to infer multi-cell intra- and inter-cellular signaling pathways and communications
Source: PubMed Central journal article supplement (PMC11155453; doi:10.3389/fncel.2024.1369242), 2024-05-23

**a. The comparison of the average differential expression level of paths extracted by PathFinder.**

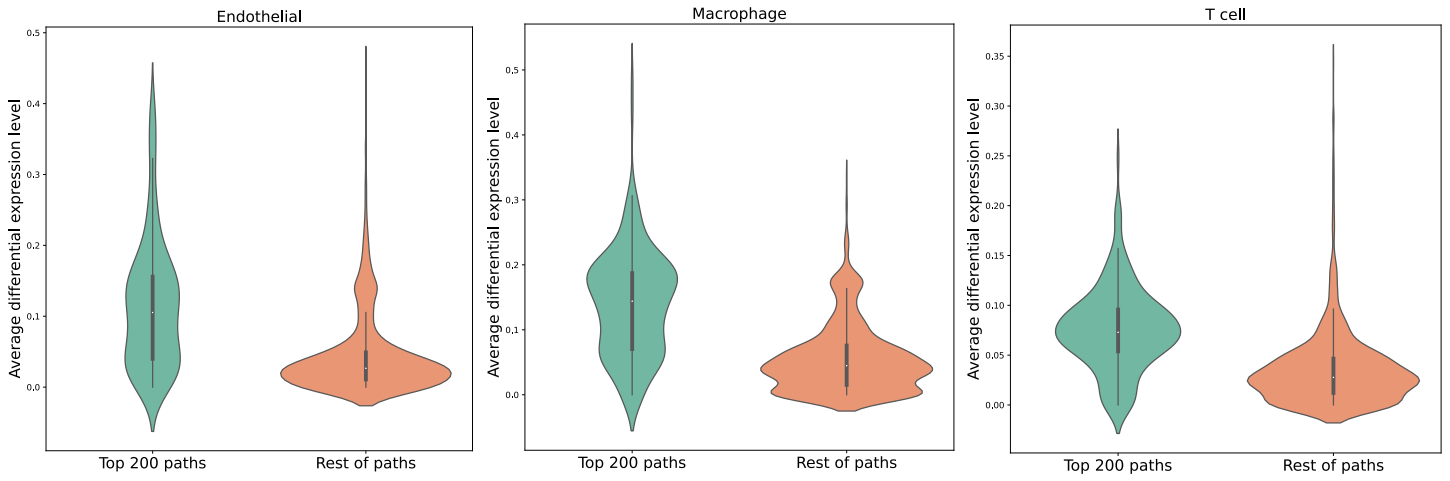

**b. The learned path scores of PathFinder on different runs**

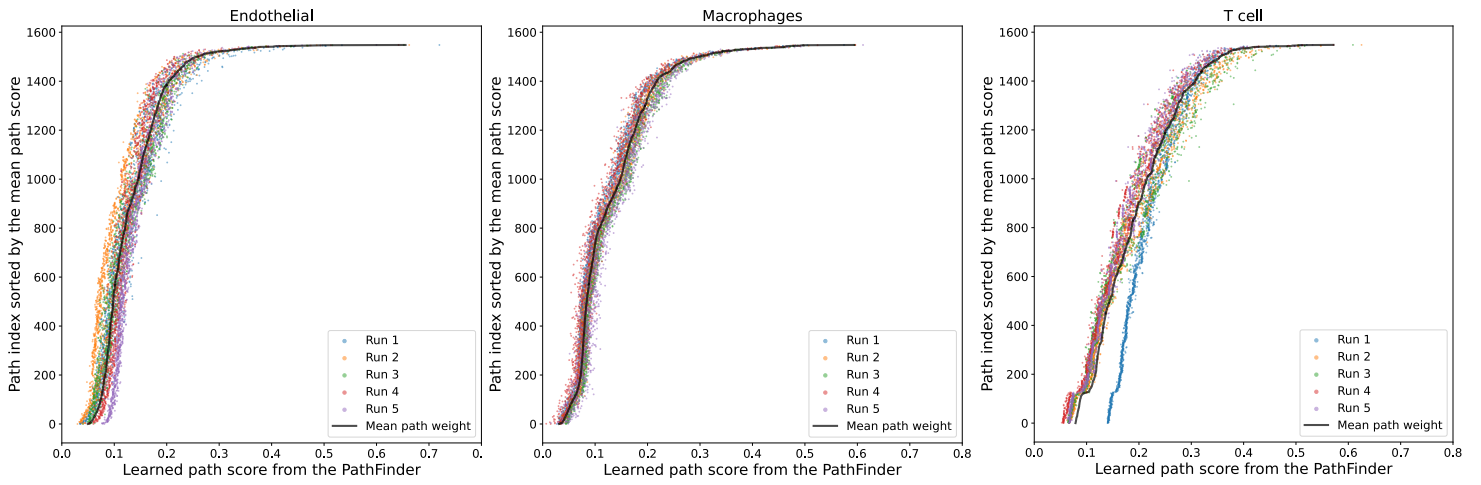

**c. Comparison of the genes discovered by PathFinder for two cohorts.**

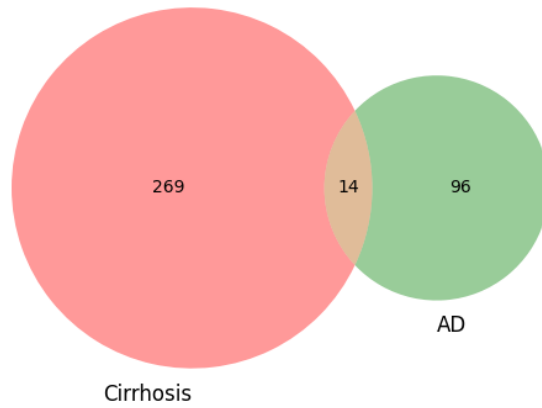

Supplement: Figure_1.pdf [file Figure_1.pdf]
